# Supplementary material for: Cardiovascular and renal burdens of metabolic associated fatty liver disease from serial US national surveys, 1999–2016
Source: PubMed Central journal article supplement — Chin Med J (Engl). 2021 Jun 4;134(13):1593–601. doi: 10.1097/CM9.0000000000001513 (PMC8280082; doi:10.1097/cm9.0000000000001513), 2021-06-04
Supplement: cm9-134-1593-s001.pdf [file cm9-134-1593-s001.pdf]

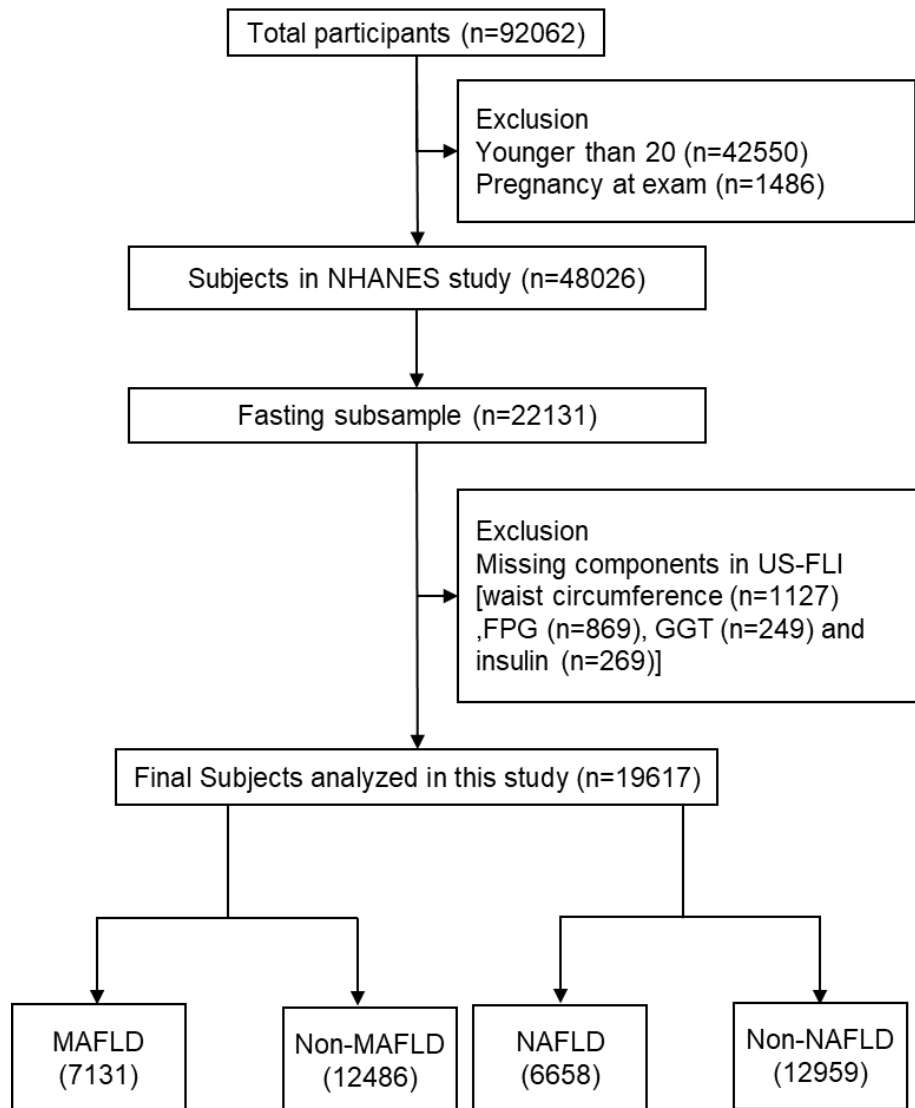

**Supplementary Figure 1:** Flowchart of participants from NHANES. Because US-FLI used FPG, only a fasting subsample was used. FPG: Fasting plasma glucose; MAFLD: Metabolic associated fatty liver disease; NAFLD: Nonalcoholic fatty liver disease; NHANES: National Health and Nutrition Examination Survey; US-FLI: Ultrasound-fatty liver index.

**Supplementary Table 1: Potential risk factors associated with MAFLD.**

| <b>Risk factors</b>                      | <b>MAFLD, OR (95% CI)</b> | <b>P-value</b> |
|------------------------------------------|---------------------------|----------------|
| Male sex                                 | 2.65 (2.34, 3.02)         | <0.001         |
| Age per 10 years                         | 1.09 (1.05, 1.13)         | <0.001         |
| White vs. Mexican American               | 0.34 (0.29, 0.40)         | <0.001         |
| Black vs. Mexican American               | 0.16 (0.14, 0.19)         | <0.001         |
| Completed high-school education or above | 0.96 (0.82, 1.11)         | 0.554          |
| At or below poverty line                 | 1.13 (0.99, 1.28)         | 0.068          |
| Current smoking                          | 0.90 (0.78, 1.04)         | 0.146          |
| Central obesity                          | 12.96 (11.40,14.73)       | <0.001         |
| Diabetes                                 | 3.23 (2.82, 3.70)         | <0.001         |
| Systolic BP per 10 mmHg                  | 1.14 (1.10, 1.17)         | <0.001         |
| LDL per 20 mg/dL                         | 0.99 (0.96, 1.02)         | 0.529          |
| High-density lipoprotein per 10 mg/dL    | 0.74 (0.70, 0.78)         | <0.001         |
| Triglycerides per 100 mg/dL              | 1.85 (1.69, 2.02)         | <0.001         |

Multivariate logistic regression analyses were used. Central obesity was defined by waist circumference  $\geq 102$  cm in men or waist circumference  $\geq 88$  cm in women. SI conversion factors: To convert total, LDL, and high-density lipoprotein cholesterol to mmol/L, multiply by 0.0259; triglycerides to mmol/L, multiply by 0.0113. BP: Blood pressure; CI: Confidence interval; LDL: Low-density lipoprotein; MAFLD: Metabolic associated fatty liver disease; OR: Odds ratio.

**Supplementary Table 2: Mean BP, lipid, glycemic, and weight levels in US adults aged 20 years and older by MAFLD and NAFLD status, 1999–2016.**

| Items                          | 1999–2002<br>( <i>n</i> = 3954) | 2003–2006<br>( <i>n</i> = 3789) | 2007–2010<br>( <i>n</i> = 5003) | 2011–2016<br>( <i>n</i> = 6871) | Total                | <i>P</i> <sub>trend</sub> | <i>P</i> <sub>interactio<br/>n</sub> | <i>P</i> * | β (95% CI)**         |
|--------------------------------|---------------------------------|---------------------------------|---------------------------------|---------------------------------|----------------------|---------------------------|--------------------------------------|------------|----------------------|
| <b>Systolic BP (mmHg)</b>      |                                 |                                 |                                 |                                 |                      |                           |                                      |            |                      |
| Whole population               |                                 |                                 |                                 |                                 |                      |                           |                                      |            |                      |
| MAFLD                          | 128.0 (127.0, 129.1)            | 126.4 (125.4, 127.4)            | 123.7 (122.9, 124.6)            | 126.8 (125.9, 127.7)            | 126.2 (125.7, 126.7) | 0.026                     | 0.108                                | 0.003      | 4.81 (4.27, 5.35)    |
| NAFLD                          | 127.8 (126.6, 128.9)            | 126.1 (125.0, 127.2)            | 123.5 (122.6, 124.4)            | 126.4 (125.5, 127.3)            | 125.9 (125.4, 126.4) | 0.021                     | 0.313                                |            | 4.17 (3.54, 4.80)    |
| Non-MAFLD                      | 120.7 (119.7, 121.8)            | 119.4 (118.4, 120.3)            | 117.0 (116.0, 118.1)            | 118.7 (118.1, 119.4)            | 118.9 (118.5, 119.4) | <0.001                    |                                      |            |                      |
| Non-NAFLD                      | 121.0 (120.0, 122.0)            | 119.7 (118.7, 120.6)            | 117.4 (116.3, 118.4)            | 119.3 (118.5, 120.0)            | 119.3 (118.9, 119.8) | <0.001                    |                                      |            |                      |
| Individuals with hypertension  |                                 |                                 |                                 |                                 |                      |                           |                                      |            |                      |
| MAFLD                          | 137.2 (135.5, 138.8)            | 134.5 (133.0, 136.1)            | 130.7 (129.6, 131.8)            | 134.2 (132.8, 135.6)            | 134.0 (133.2, 134.7) | 0.001                     | <0.001                               | 0.225      | −2.25 (−3.36, −1.15) |
| NAFLD                          | 137.0 (135.3, 138.7)            | 134.6 (132.9, 136.3)            | 130.5 (129.4, 131.8)            | 133.8 (132.3, 135.3)            | 133.8 (133.0, 134.6) | 0.001                     | 0.004                                |            | −2.81 (−4.13, −1.50) |
| Non-MAFLD                      | 143.7 (142.1, 145.2)            | 139.4 (137.5, 141.2)            | 133.7 (131.7, 135.7)            | 134.7 (132.7, 136.7)            | 137.5 (136.4, 138.5) | <0.001                    |                                      |            |                      |
| Non-NAFLD                      | 143.5 (141.7, 145.2)            | 139.0 (137.3, 140.8)            | 133.7 (131.7, 135.7)            | 135.0 (132.8, 137.3)            | 137.4 (136.3, 138.5) | <0.001                    |                                      |            |                      |
| <b>LDL cholesterol (mg/dL)</b> |                                 |                                 |                                 |                                 |                      |                           |                                      |            |                      |
| Whole population               |                                 |                                 |                                 |                                 |                      |                           |                                      |            |                      |
| MAFLD                          | 127.0 (123.6, 130.5)            | 117.1 (114.3, 120.0)            | 118.9 (116.3, 121.6)            | 115.6 (113.5, 117.7)            | 118.6 (117.3, 120.0) | 0.026                     | 0.108                                | 0.473      | 2.01 (0.61, 3.40)    |
| NAFLD                          | 126.6 (123.3, 130.0)            | 117.5 (114.7, 120.2)            | 118.6 (115.9, 121.3)            | 115.4 (113.3, 117.5)            | 118.5 (117.2, 119.8) | <0.001                    | 0.894                                |            | 1.65 (0.24, 3.07)    |
| Non-MAFLD                      | 121.6 (119.8, 123.4)            | 116.0 (114.2, 117.8)            | 114.8 (113.2, 116.3)            | 111.9 (110.7, 113.1)            | 115.6 (114.8, 116.3) | <0.001                    |                                      |            |                      |
| Non-NAFLD                      | 121.9 (120.0, 123.8)            | 115.9 (114.1, 117.7)            | 115.0 (113.4, 116.6)            | 112.2 (110.9, 113.4)            | 115.7 (114.9, 116.5) | <0.001                    |                                      |            |                      |
| Individuals with dyslipidemia  |                                 |                                 |                                 |                                 |                      |                           |                                      |            |                      |
| MAFLD                          | 145.2 (140.9, 149.5)            | 132.8 (128.4, 137.3)            | 132.8 (129.6, 136.1)            | 127.3 (124.2, 130.3)            | 132.7 (130.9, 134.6) | <0.001                    | 0.688                                | 0.044      | −6.72 (−8.85, −4.59) |
| NAFLD                          | 145.2 (140.9, 149.4)            | 132.6 (128.1, 137.0)            | 132.1 (128.7, 135.5)            | 126.7 (123.6, 129.8)            | 132.2 (130.4, 134.1) | <0.001                    | 0.483                                |            | −7.24 (−9.38, −5.09) |
| Non-MAFLD                      | 151.3 (148.8, 153.8)            | 144.0 (141.4, 146.6)            | 142.0 (138.9, 145.1)            | 136.0 (134.1, 137.9)            | 142.5 (141.3, 143.8) | <0.001                    |                                      |            |                      |

|                                    |                      |                      |                      |                      |                      |        |       |       |                      |
|------------------------------------|----------------------|----------------------|----------------------|----------------------|----------------------|--------|-------|-------|----------------------|
| Non-NAFLD                          | 151.1 (148.7, 153.5) | 143.9 (141.4, 146.4) | 142.1 (139.0, 145.3) | 136.0 (134.0, 137.9) | 142.4 (141.2, 143.7) | <0.001 |       |       |                      |
| <b>Fasting glucose (mg/dL)</b>     |                      |                      |                      |                      |                      |        |       |       |                      |
| Whole population                   |                      |                      |                      |                      |                      |        |       |       |                      |
| MAFLD                              | 118.0 (114.9, 121.0) | 114.5 (112.1, 116.8) | 116.0 (114.0, 117.9) | 118.8 (116.7, 120.9) | 117.1 (115.9, 118.3) | 0.422  | 0.118 | 0.694 | 17.56 (16.38, 18.74) |
| NAFLD                              | 117.5 (114.5, 120.5) | 114.6 (111.9, 117.3) | 115.8 (113.9, 117.8) | 119.2 (116.8, 121.5) | 117.2 (115.9, 118.4) | 0.226  | 0.059 |       | 16.96 (15.67, 18.24) |
| Non-MAFLD                          | 97.3 (96.4, 98.2)    | 97.6 (96.5, 98.6)    | 97.3 (96.5, 98.1)    | 96.9 (96.3, 97.5)    | 97.2 (96.8, 97.7)    | 0.041  |       |       |                      |
| Non-NAFLD                          | 98.0 (97.2, 98.9)    | 97.9 (97.0, 98.9)    | 98.0 (97.1, 98.9)    | 97.6 (97.0, 98.3)    | 97.9 (97.5, 98.3)    | 0.041  |       |       |                      |
| Individuals with diabetes          |                      |                      |                      |                      |                      |        |       |       |                      |
| MAFLD                              | 165.5 (157.2, 173.8) | 155.9 (147.1, 164.7) | 155.4 (148.3, 162.5) | 163.7 (158.2, 169.2) | 160.7 (157.1, 164.3) | 0.771  | 0.217 | 0.690 | 20.18 (14.36, 26.00) |
| NAFLD                              | 163.6 (155.1, 172.2) | 155.6 (146.1, 165.1) | 154.2 (147.2, 161.3) | 165.0 (158.7, 171.3) | 160.5 (156.7, 164.4) | 0.405  | 0.057 |       | 17.19 (11.32, 23.06) |
| Non-MAFLD                          | 148.0 (131.9, 164.0) | 142.1 (130.1, 154.0) | 138.0 (129.1, 146.8) | 137.6 (131.4, 143.8) | 140.3 (135.4, 145.2) | 0.148  |       |       |                      |
| Non-NAFLD                          | 154.6 (140.5, 168.9) | 143.6 (132.4, 154.8) | 142.0 (132.9, 151.2) | 139.4 (133.9, 144.8) | 143.3 (138.8, 147.8) | 0.049  |       |       |                      |
| <b>Glycosylated hemoglobin (%)</b> |                      |                      |                      |                      |                      |        |       |       |                      |
| Whole population                   |                      |                      |                      |                      |                      |        |       |       |                      |
| MAFLD                              | 5.9 (5.8, 6.0)       | 5.8 (5.7, 5.8)       | 5.9 (5.8, 6.0)       | 6.0 (6.0, 6.1)       | 5.9 (5.9, 6.0)       | 0.009  | 0.697 | 0.022 | 0.48 (0.44, 0.52)    |
| NAFLD                              | 5.9 (5.8, 6.0)       | 5.8 (5.7, 5.9)       | 5.9 (5.8, 6.0)       | 6.1 (6.0, 6.1)       | 5.9 (5.9, 6.0)       | 0.005  | 0.525 |       | 0.48 (0.44, 0.52)    |
| Non-MAFLD                          | 5.3 (5.2, 5.3)       | 5.3 (5.3, 5.4)       | 5.4 (5.4, 5.5)       | 5.4 (5.4, 5.5)       | 5.4 (5.4, 5.4)       | <0.001 |       |       |                      |
| Non-NAFLD                          | 5.3 (5.2, 5.3)       | 5.3 (5.3, 5.4)       | 5.4 (5.4, 5.5)       | 5.5 (5.4, 5.5)       | 5.4 (5.4, 5.4)       | <0.001 |       |       |                      |
| Individuals with diabetes          |                      |                      |                      |                      |                      |        |       |       |                      |
| MAFLD                              | 7.4 (7.1, 7.7)       | 7.0 (6.8, 7.2)       | 7.1 (6.9, 7.3)       | 7.5 (7.3, 7.7)       | 7.3 (7.2, 7.4)       | 0.130  | 0.726 | 0.329 | 0.36 (0.19, 0.52)    |
| NAFLD                              | 7.3 (7.0, 7.6)       | 7.1 (6.8, 7.3)       | 7.1 (6.9, 7.2)       | 7.6 (7.4, 7.8)       | 7.3 (7.2, 7.4)       | 0.054  | 0.261 |       | 0.37 (0.19, 0.55)    |
| Non-MAFLD                          | 6.9 (6.5, 7.3)       | 6.9 (6.6, 7.3)       | 7.0 (6.7, 7.2)       | 7.1 (6.9, 7.3)       | 7.0 (6.9, 7.1)       | 0.474  |       |       |                      |
| Non-NAFLD                          | 7.0 (6.7, 7.4)       | 6.9 (6.6, 7.2)       | 7.0 (6.7, 7.3)       | 7.0 (6.9, 7.2)       | 7.0 (6.9, 7.1)       | 0.996  |       |       |                      |
| <b>BMI (kg/m<sup>2</sup>)</b>      |                      |                      |                      |                      |                      |        |       |       |                      |
| Whole population                   |                      |                      |                      |                      |                      |        |       |       |                      |

|                                  |                      |                      |                      |                      |                      |        |       |        |                      |
|----------------------------------|----------------------|----------------------|----------------------|----------------------|----------------------|--------|-------|--------|----------------------|
| MAFLD                            | 33.1 (32.5, 33.8)    | 34.1 (33.5, 34.7)    | 33.4 (33.0, 33.7)    | 34.5 (34.0, 34.9)    | 33.9 (33.6, 34.2)    | 0.001  | 0.058 | <0.001 | 8.30 (8.02, 8.58)    |
| NAFLD                            | 33.3 (32.6, 33.9)    | 34.3 (33.7, 34.9)    | 33.5 (33.1, 33.9)    | 34.7 (34.2, 35.1)    | 34.1 (33.8, 34.3)    | <0.001 | 0.055 |        | 8.18 (7.89, 8.46)    |
| Non-MAFLD                        | 25.8 (25.6, 26.0)    | 26.2 (26.0, 26.3)    | 26.0 (25.7, 26.2)    | 26.2 (26.0, 26.5)    | 26.1 (25.9, 26.2)    | 0.103  |       |        |                      |
| Non-NAFLD                        | 26.0 (25.8, 26.2)    | 26.3 (26.1, 26.5)    | 26.2 (25.9, 26.4)    | 26.5 (26.2, 26.7)    | 26.3 (26.1, 26.4)    | 0.027  |       |        |                      |
| Individuals with general obesity |                      |                      |                      |                      |                      |        |       |        |                      |
| MAFLD                            | 36.3 (35.6, 37.0)    | 36.9 (36.3, 37.4)    | 36.3 (35.9, 36.7)    | 37.0 (36.5, 37.5)    | 36.7 (36.4, 37.0)    | 0.046  | 0.006 | 0.001  | 4.24 (3.92, 4.57)    |
| NAFLD                            | 36.3 (35.6, 37.1)    | 37.0 (36.5, 37.6)    | 36.4 (36.0, 36.8)    | 37.1 (36.7, 37.6)    | 36.8 (36.5, 37.1)    | 0.025  | 0.005 |        | 3.94 (3.61, 4.27)    |
| Non-MAFLD                        | 33.8 (33.4, 34.3)    | 33.9 (33.6, 34.2)    | 33.6 (33.3, 33.9)    | 33.2 (32.9, 33.5)    | 33.5 (33.4, 33.7)    | 0.028  |       |        |                      |
| Non-NAFLD                        | 34.1 (33.6, 34.5)    | 33.9 (33.6, 34.2)    | 33.8 (33.5, 34.2)    | 33.4 (33.0, 33.7)    | 33.7 (33.5, 33.9)    | 0.058  |       |        |                      |
| <b>Waist circumference (cm)</b>  |                      |                      |                      |                      |                      |        |       |        |                      |
| Whole population                 |                      |                      |                      |                      |                      |        |       |        |                      |
| MAFLD                            | 110.6 (109.0, 112.1) | 113.5 (112.2, 114.7) | 111.4 (110.6, 112.2) | 114.1 (113.1, 115.0) | 112.7 (112.1, 113.3) | <0.001 | 0.210 | <0.001 | 20.90 (20.29, 21.52) |
| NAFLD                            | 110.5 (108.9, 112.1) | 113.6 (112.4, 114.8) | 111.8 (110.8, 112.7) | 114.4 (113.5, 115.4) | 112.9 (112.4, 113.5) | <0.001 | 0.152 |        | 20.46 (19.83, 21.09) |
| Non-MAFLD                        | 89.6 (89.1, 90.2)    | 91.4 (90.8, 91.9)    | 91.0 (90.3, 91.7)    | 91.9 (91.3, 92.6)    | 91.1 (90.8, 91.4)    | <0.001 |       |        |                      |
| Non-NAFLD                        | 90.2 (89.7, 90.8)    | 91.9 (91.3, 92.5)    | 91.5 (90.9, 92.2)    | 92.7 (92.1, 93.3)    | 91.7 (91.4, 92.0)    | <0.001 |       |        |                      |
| Individuals with central obesity |                      |                      |                      |                      |                      |        |       |        |                      |
| MAFLD                            | 113.7 (112.0, 115.4) | 116.0 (114.9, 117.1) | 114.3 (113.4, 115.2) | 116.4 (115.5, 117.3) | 115.4 (114.8, 116.0) | 0.001  | 0.024 | 0.005  | 13.13 (12.50, 13.75) |
| NAFLD                            | 113.6 (111.9, 115.4) | 116.2 (115.1, 117.4) | 114.5 (113.6, 115.5) | 116.6 (115.7, 117.5) | 115.5 (115.0, 116.1) | 0.001  | 0.029 |        | 12.59 (11.96, 13.21) |
| Non-MAFLD                        | 100.6 (100.0, 101.2) | 101.2 (100.6, 101.7) | 101.2 (100.5, 101.9) | 101.5 (100.9, 102.0) | 101.2 (100.9, 101.5) | 0.089  |       |        |                      |
| Non-NAFLD                        | 101.5 (100.9, 102.1) | 101.8 (101.2, 102.4) | 101.8 (101.1, 102.5) | 102.4 (101.8, 103.1) | 102.0 (101.6, 102.3) | 0.043  |       |        |                      |

Data are from the NHANESs between 1999 and 2016. Data are expressed as mean (95% CI).  $P_{\text{trend}}$  was calculated for each MAFLD group by including a continuous variable for the midpoint of each survey period in logistic regression models; significant values indicated variation over time within MAFLD groups. BP: Blood pressure; BMI: Body mass index; CI: Confidence interval;

LDL: Low-density lipoprotein; MAFLD: Metabolic associated fatty liver disease; NHANESs: National Health and Nutrition Examination Surveys; NAFLD: Nonalcoholic fatty liver disease.

\*MAFLD vs. NAFLD; \*\* vs. non-MAFLD or non-NAFLD.

**Supplementary Table 3: Cardiovascular and renal markers in MAFLD with and without significant alcohol use.**

| <b>Variables</b>                            | <b>MAFLD without significant alcohol use</b> | <b>MAFLD with significant alcohol use</b> | <b>Adjusted P-value</b> |
|---------------------------------------------|----------------------------------------------|-------------------------------------------|-------------------------|
| <i>N</i>                                    | 6745                                         | 386                                       |                         |
| Age (years)                                 | 50.88 (0.28)                                 | 49.34 (1.00)                              |                         |
| Male                                        | 57.1 (0.8)                                   | 77.3 (2.7)                                |                         |
| BMI (kg/m <sup>2</sup> )                    | 34.05 (0.13)                                 | 31.64 (0.32)                              | <0.001                  |
| Diabetes (%)                                | 25.0 (0.7)                                   | 18.9 (2.5)                                | 0.133                   |
| Hypertension (%)                            | 48.0 (0.9)                                   | 52.2 (3.3)                                | 0.017                   |
| Dyslipidemia (%)                            | 56.5 (0.9)                                   | 55.4 (3.4)                                | 0.871                   |
| General Obesity (%)                         | 70.8 (0.8)                                   | 61.1 (2.9)                                | 0.006                   |
| Central obesity (%)                         | 87.1 (0.6)                                   | 79.4 (2.6)                                | 0.073                   |
| 10-year risk of cardiovascular events (%)   |                                              |                                           |                         |
| Framingham                                  | 12.92 (0.22)                                 | 17.22 (1.22)                              | 0.017                   |
| ASCVD                                       | 10.69 (0.22)                                 | 11.91 (1.05)                              | 0.155                   |
| Previous myocardial infarction (%)          | 5.7 (0.3)                                    | 3.8 (1.2)                                 | 0.258                   |
| Previous stroke (%)                         | 4.1 (0.3)                                    | 2.0 (0.9)                                 | 0.322                   |
| Any CKD (%)                                 | 18.9 (0.7)                                   | 15.8 (2.7)                                | 0.849                   |
| ACR ≥ 30 mg/g (%)                           | 13.6 (0.6)                                   | 13.5 (2.7)                                | 0.668                   |
| eGFR <60 mL/min per 1.73 m <sup>2</sup> (%) | 7.6 (0.4)                                    | 2.6 (0.9)                                 | 0.050                   |
| Mean eGFR (mL/min per 1.73 m <sup>2</sup> ) | 92.56 (0.43)                                 | 98.49 (0.95)                              | <0.001                  |
| Hyperfiltration (%)                         | 1.4 (0.2)                                    | 1.3 (0.5)                                 | 0.908                   |

Data are from the NHANESs between 1999 and 2016. All analyses were adjusted for age, sex, and race or ethnic group. 10-year cardiovascular risks were calculated using Framingham and ASCVD risk scores. Any CKD refers, urinary ACR ≥30 mg/g, eGFR <60 mL/min per 1.73 m<sup>2</sup>, or both. Hyperfiltration was defined as eGFR ≥135 mL/min per 1.73 m<sup>2</sup>. ACR: Albumin-to-creatinine ratio; ASCVD: Atherosclerotic Cardiovascular Disease guidelines (from the American Heart Association and American College of Cardiology); BMI: Body mass index; CKD: Chronic kidney disease; eGFR: Estimated glomerular filtration rate; MAFLD: Metabolic associated fatty liver disease; NHANESs: National Health and Nutrition Examination Surveys.

**Supplementary Table 4: Estimates of 10-year risk of cardiovascular events in US adults of MAFLD or NAFLD without any antihypertensive, anti-diabetic, and lipid-lowering medication, 1999–2016.**

| Items      | 1999–2002         | 2003–2006       | 2007–2010      | 2011–2016       | Total           | $P_{\text{trend}}$ | $P_{\text{interaction}}$ | $P^*$ | $\beta$ (95% CI)** |
|------------|-------------------|-----------------|----------------|-----------------|-----------------|--------------------|--------------------------|-------|--------------------|
| Framingham |                   |                 |                |                 |                 |                    |                          |       |                    |
| MAFLD      | 11.6 (10.4, 12.8) | 9.3 (8.6, 10.0) | 8.8 (8.2, 9.3) | 9.2 (8.2, 10.2) | 9.6 (9.1, 10.1) | 0.006              | 0.620                    | 0.002 | 2.6 (2.2, 2.9)     |
| NAFLD      | 11.1 (9.8, 12.4)  | 8.9 (8.2, 9.7)  | 8.5 (8.0, 9.1) | 8.7 (8.0, 9.4)  | 9.2 (8.8, 9.6)  | 0.003              | 0.243                    |       | 2.1 (1.8, 2.5)     |
| ASCVD      |                   |                 |                |                 |                 |                    |                          |       |                    |
| MAFLD      | 9.7 (8.3, 11.0)   | 7.7 (6.9, 8.5)  | 7.0 (6.3, 7.8) | 6.8 (5.9, 7.8)  | 7.6 (7.1, 8.2)  | 0.001              | 0.649                    | 0.040 | 1.9 (1.5, 2.2)     |
| NAFLD      | 9.3 (7.9, 10.8)   | 7.5 (6.6, 8.4)  | 7.0 (6.2, 7.7) | 6.5 (5.8, 7.2)  | 7.4 (6.9, 7.8)  | 0.000              | 0.170                    |       | 1.5 (1.1, 1.8)     |

Data are from the NHANESs between 1999 and 2016. Data are expressed as percentage (95% CI). All analyses were adjusted for age, sex, and race or ethnic group. 10-year cardiovascular risks were calculated using Framingham and ASCVD risk scores.  $P_{\text{trend}}$  was calculated for the MAFLD status group by including a continuous variable for the midpoint of each survey period in logistic regression models; significant values indicated variation over time within MAFLD groups. Significant  $P_{\text{interaction}}$  values indicate varying associations between prevalence estimates over time across MAFLD groups. ASCVD: Atherosclerotic Cardiovascular Disease guidelines (from the American Heart Association and American College of Cardiology); CI: Confidence interval; MAFLD: Metabolic associated fatty liver disease; NHANESs: National Health and Nutrition Examination Surveys; NAFLD: Nonalcoholic fatty liver disease. \*MAFLD vs. NAFLD; \*\*vs. non-MAFLD or non-NAFLD.

**Supplementary Table 5: Cardiovascular and renal markers in participants with MAFLD but non-NAFLD and NAFLD.**

| Items                                          | MAFLD-non NAFLD   | NAFLD             | <i>P</i>  |
|------------------------------------------------|-------------------|-------------------|-----------|
| N                                              | 518               | 6658              |           |
| 10-year risk of cardiovascular events, %       |                   |                   |           |
| Framingham                                     | 16.6 (14.6, 18.7) | 12.9 (12.4, 13.3) | 0.013     |
| ASCVD                                          | 11.5 (9.7, 13.2)  | 10.7 (10.3, 11.1) | 0.104     |
| Previous myocardial infarction, %              | 4.7 (2.8, 7.7)    | 5.6 (5.0, 6.3)    | 0.605     |
| Previous stroke, %                             | 3.3 (1.7, 6.2)    | 4.0 (3.4, 4.7)    | 0.987     |
| Any CKD, %                                     | 17.8 (13.5, 23.0) | 18.8 (17.5, 20.2) | 0.669     |
| ACR $\geq$ 30 mg/g, %                          | 14.3 (10.4, 19.4) | 13.6 (12.5, 14.8) | 0.499     |
| eGFR $<$ 60 mL/min per 1.73 m <sup>2</sup> , % | 3.9 (2.4, 6.3)    | 7.6 (6.8, 8.4)    | 0.449     |
| Mean eGFR, mL/min per 1.73 m <sup>2</sup>      | 97.4 (95.6, 99.2) | 92.6 (91.7, 93.4) | $<$ 0.001 |
| Hyperfiltration, %                             | 1.1 (0.5, 2.4)    | 1.4 (1.1, 1.8)    | 0.967     |

Data are from the NHANESs between 1999 and 2016. Data are expressed as percentage (95% CI). All analyses were adjusted for age, sex, and race or ethnic group. 10-year cardiovascular risks were calculated using Framingham and ASCVD risk scores. Any CKD refers, urinary ACR  $\geq$ 30 mg/g, eGFR  $<$ 60 mL/min per 1.73 m<sup>2</sup>, or both. Hyperfiltration was defined as eGFR  $\geq$ 135 mL/min per 1.73 m<sup>2</sup>. ACR: Albumin-to-creatinine ratio; ASCVD: Atherosclerotic Cardiovascular Disease guidelines (from the American Heart Association and American College of Cardiology); CKD: Chronic kidney disease; CI: Confidence interval; eGFR: Estimated glomerular filtration rate; MAFLD: Metabolic associated fatty liver disease; NHANESs: National Health and Nutrition Examination Surveys; NAFLD: Nonalcoholic fatty liver disease.
